# Supplementary material for: Hyperthermia Induces the ER Stress Pathway
Source: PubMed Central journal article supplement (PMC3158104; doi:10.1371/journal.pone.0023740), 2011-08-18
Supplement: pone.0023740.s001.pdf [file pone.0023740.s001.pdf]

**Supplementary Figure S1 Primers used for real-time PCR**

| Species | Gene   | Forward primer        | Reverse primer         |
|---------|--------|-----------------------|------------------------|
| Human   | Hsp70  | ttttcgagagtgactcccgtt | cacaggttcgctctgggaag   |
|         | Bip    | ccttgtcttcagctgtcact  | tgcttgatgatgtcccctta   |
|         | Gadd34 | tgagcgagaggcaaccagt   | tctgcaaattgacttcctgc   |
|         | Chop   | tgggctacactgagcaccag  | cttcgggacacttgccagct   |
|         | Dnajc3 | ccttcgtactgcagatccacc | gggctcggattccccttc     |
|         | Erp72  | aataccaggatgccgctaac  | gcaaagggtgactcagggaa   |
|         | GAPDH  | ccagggctgctttaactc    | gctccccctgcaaatga      |
| Mouse   | Hsp70  | tggtgagccacttcgtgga   | tgatgtccttcttgtgtctcct |
|         | Bip    | gcttcgtgtctcctcctgac  | taggagtccagcaacaggct   |
|         | Gadd34 | gtgcagccaaggtgattct   | aggtggccttctattaccgg   |
|         | Chop   | ccaacagaggtcacacgcac  | tgactggaatctggagagcga  |
|         | Dnajc3 | atgtcagctgcccgtagtgtg | gacctgtgtccatgcagcc    |
|         | Erp72  | ttccacgtgatggatgttcag | agtcttacgatggcccacca   |
|         | GAPDH  | ggagcgagaccccactaaca  | acatactcagcaccggcctc   |
| Rat     | Hsp70  | ggtcactgctagctccgtgtt | aacccccacaaatcacaacc   |
|         | Bip    | acccttactcgggcaaatt   | agagcggaacaggctcatgt   |
|         | Gadd34 | caccacctccccactttctt  | ctacagccccttcacctgca   |
|         | Chop   | cctgaaagcagaaaccggtc  | cctcataccaggcttcagc    |
|         | Dnajc3 | tcccgaatctgctgatcgtt  | ggactatgaagtgcccagg    |
|         | Erp72  | tctaaccaatcaccgggctg  | tcatggtaagggtgccgagg   |
|         | GAPDH  | caccacaactgcttagccc   | tggcatggactgtggctatg   |
